# Supplementary material for: β-actin contributes to open chromatin for activation of the adipogenic pioneer factor CEBPA during transcriptional reprograming
Source: PubMed Central journal article supplement — Mol Biol Cell. 2020 Nov 1;31(23):2511–21. doi: 10.1091/mbc.E19-11-0628 (PMC7851876; doi:10.1091/mbc.e19-11-0628), 2020-11-01
Supplement: mbc-31-2511-s001.pdf [file mbc-31-2511-s001.pdf]

# Supplemental Materials

*Molecular Biology of the Cell*

Al-Sayegh *et al.*

## **SUPPLEMENTAL INFORMATION**

### **Legends to supplemental figures and tables**

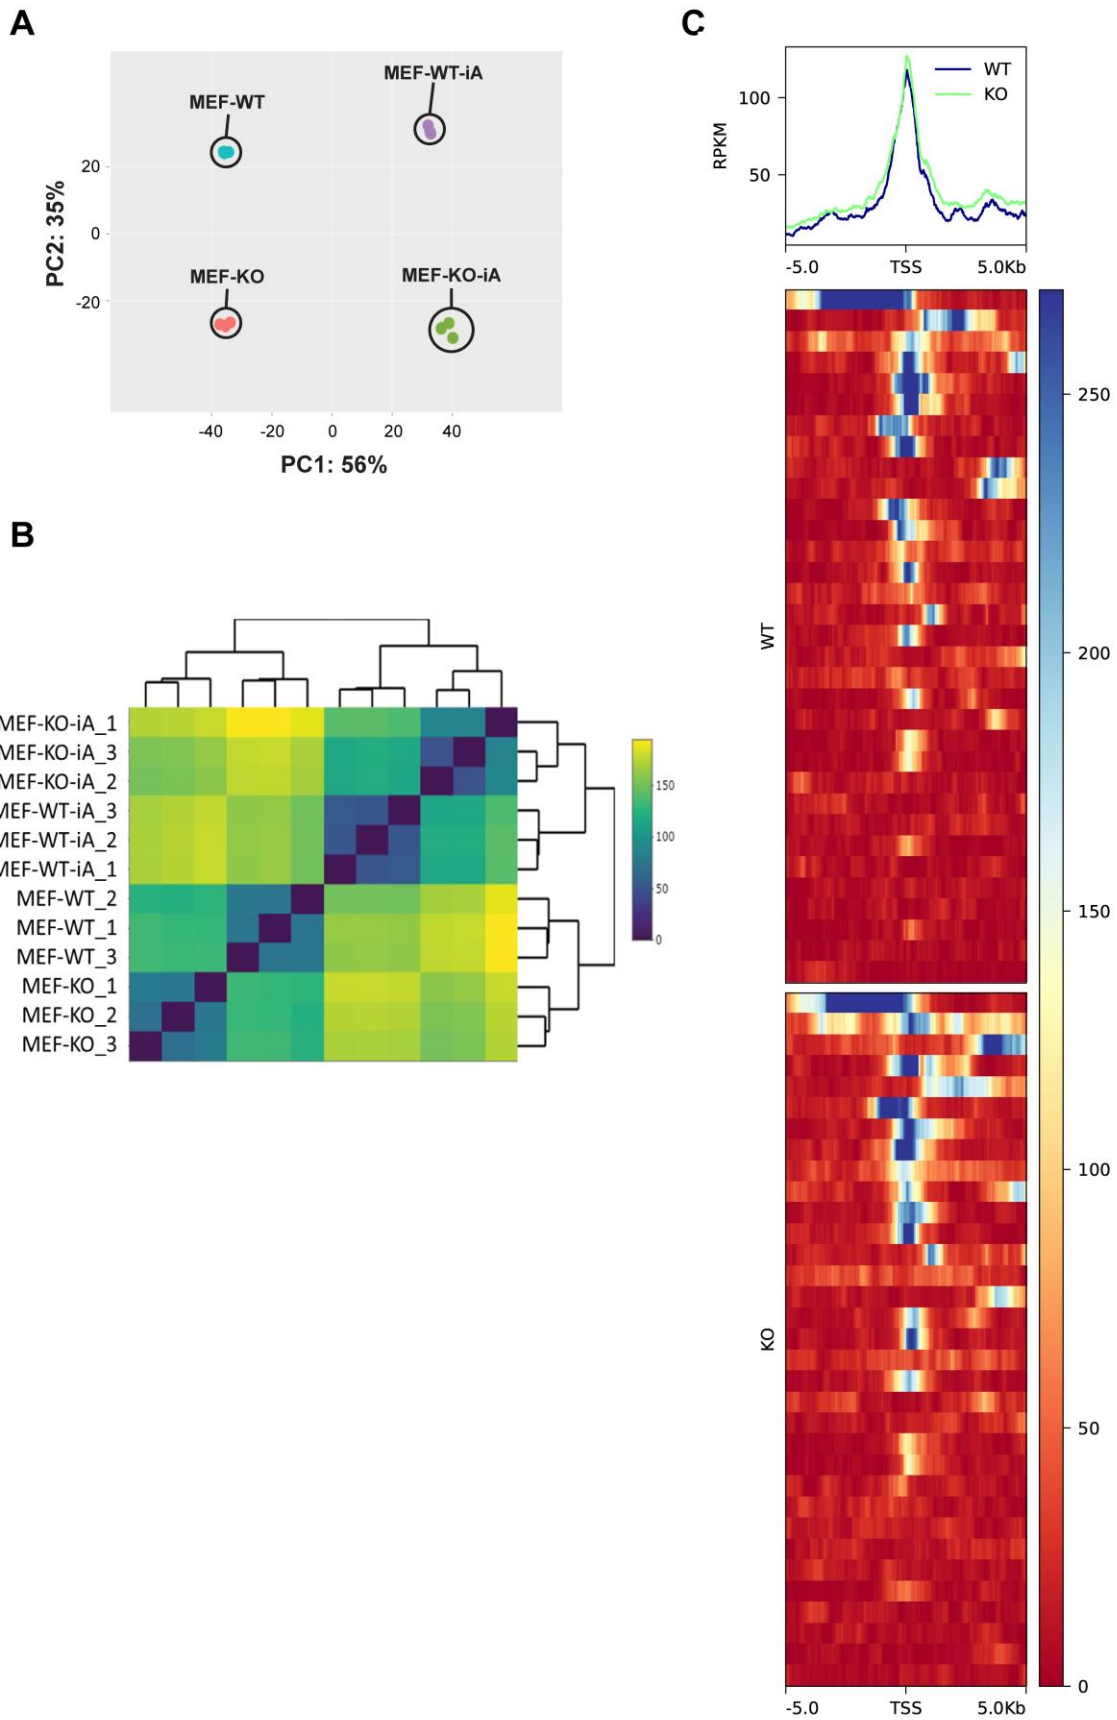

**Figure S1. Correlation analysis on the effect of differentiation in WT and KO conditions and analysis of chromatin accessibility on differentially expressed genes involved in adipocyte differentiation.** (A) Principal component analysis (PCA) illustrating total transformed variances including PC1 (48%) and PC2 (21%) for WT and KO MEF and MEF-iA condition. (B) A complementary distance heatmap representation of PCA illustrating high level of clustering based mainly on differentiation treatment. Clustering is based on CV of gene expression count levels of three biological replicates (n=3). (C) Transcription start sites of differentially expressed genes do not show significant difference in average chromatin accessibility between WT and KO cells. Density map of ATAC-seq reads  $\pm 5$  kb of TSSs of all 33 genes involved in fat cell differentiation. Top: Mean ATAC-Seq signal  $\pm 5$  kb around TSSs. TSS: Transcription start site. Scale bar: normalized RPKM. ATAC-seq profile data for each assay are presented as the mean of two biologically independent replicates (n=2).

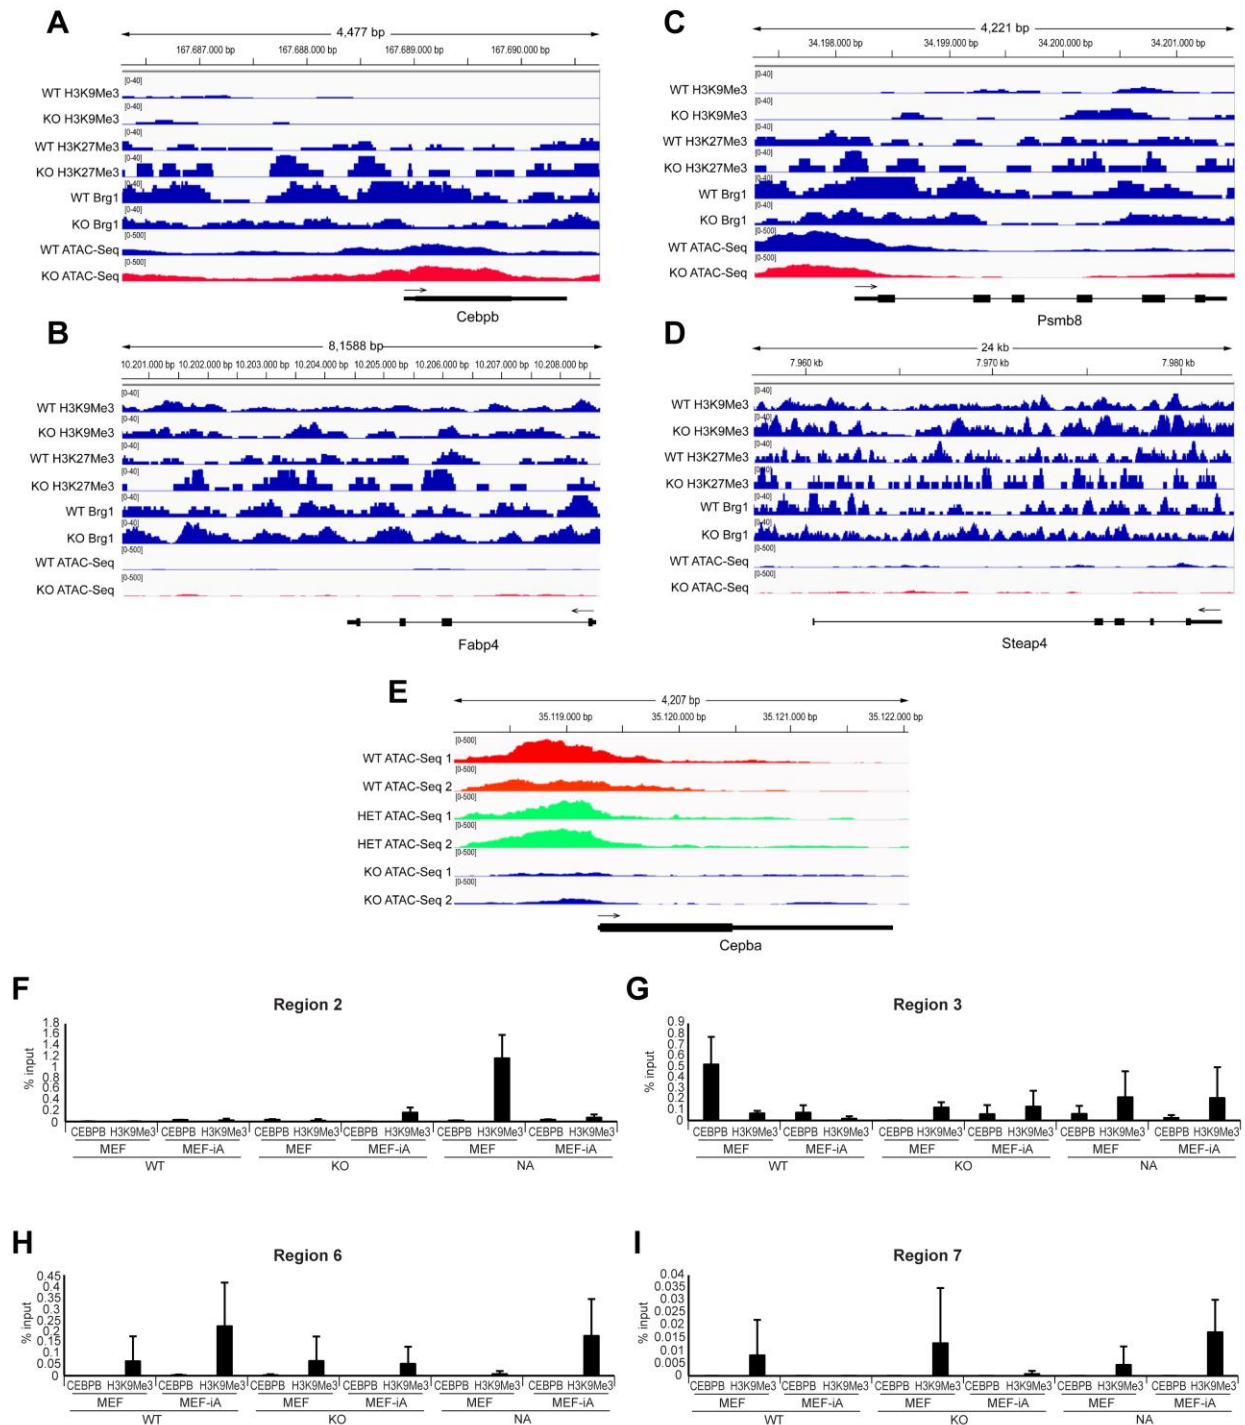

**Figure S2.  $\beta$ -actin dependent changes in chromatin accessibility are *Cebpa* specific and not observed in *Cebpb*, *Fabp4* and in the downregulated genes *Psmb8* or *Steap4*.** ChIP-seq profiles of H3K9Me3, H3K27Me3, Brg1 and ATAC-Seq profiles of WT and KO cells around

the *Cebpb* (A) and *Fabp4* (B). ChIP-seq profiles of H3K9Me3, H3K27Me3, Brg1 and ATAC-Seq profiles of WT and KO cells around the *Psmb8* (A) and *Steap4* (B) genes. The y-axis data range represents RPKM (Reads Per Kilobase of sequence range per Million mapped reads) per bin. The y-axis of tracks in the same image were set to the same range. Gene body position (exon: box, intron: line) shown below the tracks. (E) ATAC-Seq profiles of WT (WT ATAC-Seq 1 and WT ATAC-Seq 2) and KO MEF (KO ATAC-Seq 1 and KO ATAC-Seq 2) biological replicas around the *Cebpa* gene. The y-axis data range represents RPKM (Reads Per Kilobase of sequence range per Million mapped reads) per bin with scale range shown in parentheses. Gene body position (exon: box, intron: line) shown below the tracks. ATAC-seq profile data for each assay are presented as individual points consisting of two biologically independent replicates (n=2). (F-I) Results from ChIP experiments on MEFs and corresponding induced adipocytes (MEF-iA) in the wild type and knockout condition as well as in knockout cells expressing  $\beta$ -actin in the cell nucleus. For these experiments, antibodies against CEBPB and H3K9Me3 were used and analysis was performed by qPCR with primers amplifying regions R2 and R3 within the regulatory region of the *Cebpa* gene, R6 located within the *Cebpa* gene and R7 located further upstream the regulatory region of the gene within the *Cebpa* gene regulatory. Results from these experiments show that CEBPB does not bind to these regions during adipogenesis. See main Figure 4, panel A, for the location of the R1-R7 regions amplified by qPCR. The analysis was normalized against % input (n=3; \*P-Value<0.05, \*\*P-Value<0.01). CV for all three replicates are presented as mean value with error bars representing SD. Significance t-test (P-Value) were performed based a one-tailed hypothesis.

**Table 1S.** Differentially expressed genes in MEF-KO/MEF-WT under GO:0045600~positive regulation of fat cell differentiation and GO:0060612~adipose tissue development. Data presented are based on three biological replicates (n=3).

**Table 2S.** Differentially expressed genes in MEF-WT-iA/MEF-WT and MEF-KO-iA/MEF-KO under GO:0045444~fat cell differentiation. Data presented are based on three biological replicates (n=3).

**Table 1.S Differentially expressed genes in MEF-KO/MEF-WT**

(A) GO:0045600~positive regulation of fat cell differentiation

| <b><u>Ensemble ID</u></b> | <b><u>Gene ID</u></b> | <b><u>log2FoldChange</u></b><br><b><u>(MEF-KO/MEF-WT)</u></b> | <b><u>padi</u></b><br><b><u>(MEF-KO/MEF-WT)</u></b> |
|---------------------------|-----------------------|---------------------------------------------------------------|-----------------------------------------------------|
| ENSMUSG00000000440        | <i>Pparg</i>          | 1.34868566                                                    | 1.19E-11                                            |
| ENSMUSG00000042677        | <i>Zc3h12a</i>        | 1.5549223                                                     | 0.00000092                                          |
| ENSMUSG00000021127        | <i>Zfp361l</i>        | 1.14045465                                                    | 0.0000839                                           |
| ENSMUSG00000027358        | <i>Bmp2</i>           | -3.4668085                                                    | 8.97E-20                                            |
| ENSMUSG00000034997        | <i>Htr2a</i>          | 6.43577755                                                    | 0.00000124                                          |
| ENSMUSG00000020053        | <i>Igf1</i>           | -1.4945989                                                    | 4.33E-12                                            |
| ENSMUSG00000018209        | <i>Stk4</i>           | -0.5643366                                                    | 0.00000572                                          |
| ENSMUSG00000020218        | <i>Wif1</i>           | -3.9588552                                                    | 0.00034309                                          |
| ENSMUSG00000021067        | <i>Sav1</i>           | 0.44691109                                                    | 0.00206445                                          |
| ENSMUSG00000040711        | <i>Sh3pxd2b</i>       | 0.68186279                                                    | 6.70E-12                                            |
| ENSMUSG00000030170        | <i>Wnt5b</i>          | -4.649544                                                     | 3.38E-09                                            |
| ENSMUSG00000031548        | <i>Sfrp1</i>          | -2.6152183                                                    | 1.90E-24                                            |
| ENSMUSG00000022111        | <i>Uchl3</i>          | -0.9220723                                                    | 2.24E-09                                            |
| ENSMUSG00000027004        | <i>Frzb</i>           | -4.7464187                                                    | 0.00696555                                          |
| ENSMUSG00000024913        | <i>Lrp5</i>           | -0.9176541                                                    | 0.0000326                                           |
| ENSMUSG00000001729        | <i>Akt1</i>           | 0.74545534                                                    | 0.0008639                                           |
| ENSMUSG00000035642        | <i>Aamd</i>           | -0.9538121                                                    | 0.00248618                                          |
| ENSMUSG00000042190        | <i>Cmklr1</i>         | 1.40311632                                                    | 0.00179365                                          |
| ENSMUSG00000020644        | <i>Id2</i>            | 1.25934194                                                    | 9.45E-18                                            |
| ENSMUSG00000043252        | <i>Tmem64</i>         | 1.09027204                                                    | 4.39E-14                                            |
| ENSMUSG00000029659        | <i>Medag</i>          | 3.17432793                                                    | 2.07E-24                                            |

(B) GO:0060612~adipose tissue development

| <b><u>Ensemble ID</u></b> | <b><u>Gene ID</u></b> | <b><u>log2FoldChange</u></b><br><b><u>(MEF-KO/MEF-WT)</u></b> | <b><u>padi</u></b><br><b><u>(MEF-KO/MEF-WT)</u></b> |
|---------------------------|-----------------------|---------------------------------------------------------------|-----------------------------------------------------|
| ENSMUSG00000029167        | <i>Ppargc1a</i>       | 3.27872573                                                    | 2.05E-17                                            |
| ENSMUSG00000058881        | <i>Zfp516</i>         | 0.67114812                                                    | 0.00051125                                          |
| ENSMUSG00000040711        | <i>Sh3pxd2b</i>       | 0.68186279                                                    | 6.70E-12                                            |
| ENSMUSG00000028150        | <i>Rorc</i>           | 3.15213294                                                    | 1.55E-10                                            |
| ENSMUSG00000006728        | <i>Cdk4</i>           | 0.45344491                                                    | 0.00010043                                          |
| ENSMUSG00000019947        | <i>Arid5b</i>         | 0.87606858                                                    | 4.03E-10                                            |
| ENSMUSG00000024913        | <i>Lrp5</i>           | -0.9176541                                                    | 0.0000326                                           |
| ENSMUSG00000056758        | <i>Hmga2</i>          | 2.21831473                                                    | 2.06E-59                                            |
| ENSMUSG00000019505        | <i>Ubb</i>            | -1.0181737                                                    | 2.73E-13                                            |
| ENSMUSG00000022053        | <i>Ebf2</i>           | -4.0170838                                                    | 5.31E-08                                            |
| ENSMUSG00000022186        | <i>Oxct1</i>          | 0.4873298                                                     | 0.0000596                                           |
| ENSMUSG00000020644        | <i>Id2</i>            | 1.25934194                                                    | 9.45E-18                                            |



|                    |                      |            |            |
|--------------------|----------------------|------------|------------|
| ENSMUSG00000037270 | <i>4932438A13Rik</i> | -0.5678336 | 0.00041071 |
| ENSMUSG00000032047 | <i>Acat1</i>         | -0.5525831 | 0.0000609  |

**Table 2. S Differentially expressed genes in MEF-WT-iA/MEF-WT and MEF-KO-iA/MEF-KO under GO:0045444~fat cell differentiation**

| EsembleID           | GeneID               | log2FoldChange<br>(MEF-WT-iA/MEF-WT) | padj<br>(MEF-WT-iA/MEF-WT) | log2FoldChange<br>(MEF-KO-iA/MEF-KO) | padj<br>(MEF-KO-iA/MEF-KO) |
|---------------------|----------------------|--------------------------------------|----------------------------|--------------------------------------|----------------------------|
| ENSMUSG00000000440  | <i>Pparg</i>         | 0.51786289                           | 0.00942606                 | -0.076585                            | 0.79773526                 |
| ENSMUSG00000003228  | <i>Grk5</i>          | 0.6613539                            | 0.0000679                  | 1.91050874                           | 9.58E-10                   |
| ENSMUSG000000038539 | <i>Atf5</i>          | 2.65873477                           | 2.4E-52                    | 0.68590505                           | 0.00274475                 |
| ENSMUSG000000089665 | <i>Fcor</i>          | 2.23656316                           | 0.0000295                  | 2.96478959                           | 0.00016277                 |
| ENSMUSG000000024338 | <i>Psmb8</i>         | 1.01433206                           | 6.94E-09                   | 3.54056955                           | 3.18E-13                   |
| ENSMUSG000000003032 | <i>Klf4</i>          | 2.10870806                           | 1.42E-12                   | -0.4916305                           | 0.03141769                 |
| ENSMUSG000000063810 | <i>Alms1</i>         | 0.52772706                           | 0.00568059                 | -0.0212573                           | 0.94802479                 |
| ENSMUSG000000056492 | <i>Adgrf5</i>        | -2.0346365                           | 0.00055821                 | 2.98809205                           | 0.0000605                  |
| ENSMUSG000000031755 | <i>Bbs2</i>          | 0.30561865                           | 0.06190752                 | 1.10772403                           | 0.0000471                  |
| ENSMUSG000000023034 | <i>Nr4a1</i>         | 1.74224129                           | 4.33E-11                   | 1.94871999                           | 0.00216802                 |
| ENSMUSG000000051675 | <i>Trim32</i>        | 0.60606065                           | 0.0000156                  | 0.3730978                            | 0.09127414                 |
| ENSMUSG000000021379 | <i>Id4</i>           | 1.87359404                           | 0.0000496                  | 2.46133238                           | 0.00000133                 |
| ENSMUSG000000034957 | <i>Cebpa</i>         | 3.36178146                           | 4.64E-15                   | 0.35130934                           | 0.83710212                 |
| ENSMUSG000000038037 | <i>Socs1</i>         | 2.3520802                            | 1.14E-08                   | 2.79174612                           | 0.000000687                |
| ENSMUSG000000032405 | <i>Pias1</i>         | -0.0257479                           | 0.87261186                 | 0.70991335                           | 0.00451748                 |
| ENSMUSG000000071637 | <i>Cebpd</i>         | 5.34031462                           | 1.16E-18                   | 4.51279253                           | 8.29E-18                   |
| ENSMUSG000000037868 | <i>Egr2</i>          | 2.35876057                           | 0.00057074                 | 0.59950705                           | 0.39259965                 |
| ENSMUSG000000024176 | <i>Sox8</i>          | 1.35441719                           | 0.01113285                 | 4.94458324                           | 0.001218                   |
| ENSMUSG000000022428 | <i>Cbyl</i>          | 1.02171115                           | 4.10E-12                   | 0.74077583                           | 0.0000388                  |
| ENSMUSG000000014763 | <i>Fam120b</i>       | 0.48596971                           | 0.0000139                  | 0.0679004                            | 0.86116408                 |
| ENSMUSG000000036867 | <i>Smad6</i>         | 2.43417555                           | 1.1E-20                    | 1.44037089                           | 0.00000121                 |
| ENSMUSG000000020892 | <i>Aloxe3</i>        | 1.0574964                            | 0.00543788                 | 1.03145657                           | 0.16016254                 |
| ENSMUSG000000029076 | <i>Sdf4</i>          | 0.04750651                           | 0.7278131                  | 0.50183989                           | 0.0000254                  |
| ENSMUSG000000056501 | <i>Cebpb</i>         | 4.65172726                           | 7.58E-98                   | 4.4640503                            | 4.48E-53                   |
| ENSMUSG000000071657 | <i>Bscl2</i>         | 1.73134079                           | 1.18E-17                   | -0.0439241                           | 0.88174368                 |
| ENSMUSG000000027274 | <i>Mkks</i>          | 0.27857214                           | 0.21307337                 | 0.50051426                           | 0.00262598                 |
| ENSMUSG000000048040 | <i>Arxes2</i>        | -1.1563253                           | 0.00141289                 | 1.05430579                           | 0.00040725                 |
| ENSMUSG000000037270 | <i>4932438A13Rik</i> | -0.6755517                           | 0.0014751                  | 0.63768847                           | 0.00030112                 |

|                    |                 |            |            |            |            |
|--------------------|-----------------|------------|------------|------------|------------|
| ENSMUSG00000054434 | <i>Tmem120b</i> | 0.4223289  | 0.034537   | 1.03916588 | 0.00236029 |
| ENSMUSG00000051177 | <i>Plcb1</i>    | 2.42149652 | 1.83E-16   | 0.95891963 | 0.00000408 |
| ENSMUSG00000039886 | <i>Tmem120a</i> | 0.69272148 | 1.08E-08   | 0.16022916 | 0.36102691 |
| ENSMUSG00000012428 | <i>Steap4</i>   | 4.1155451  | 3.59E-34   | 2.71783163 | 0.01874944 |
| ENSMUSG00000006464 | <i>Bbs1</i>     | 0.80670504 | 0.00020617 | 0.20377535 | 0.64370011 |
